# Supplementary material for: Comparison of the New Neo-Glasgow Prognostic Score Based on the Albumin-Bilirubin Grade with Currently Used Nutritional Indices for Prognostic Prediction following Surgical Resection of Hepatocellular Carcinoma: A Multicenter Retrospective Study in Japan
Source: MDPI journal article supplement (doi:10.3390/cancers14092091), 2022-04-22
Supplement: s1 [file s1]

Supplementary Materials

# Comparison of the New Neo-Glasgow Prognostic Score Based on the Albumin-Bilirubin Grade with Currently Used Nutritional Indices for Prognostic Prediction Following Surgical Resection of Hepatocellular Carcinoma: A Multicenter Retrospective Study in Japan

Masaki Kaibori, Atsushi Hiraoka, Hiroya Iida, Koji Komeda, Fumitoshi Hirokawa, Masaki Ueno, Hisashi Kosaka, Kosuke Matsui and Mitsugu Sekimoto

**Table S1.** Tumor-Node-Metastasis staging by the Liver Cancer Group Study Group of Japan, 6th edition.

| T factor * for TNM stage of LCSGJ, 6th edition |
|------------------------------------------------|
| T1: fulfilling three factors                   |
| T2: fulfilling two factors                     |
| T3: fulfilling one factor                      |
| T4: fulfilling no factor                       |
| TNM stages in LCSGJ, 6th edition               |
| Stage I: T1N0M0                                |
| Stage II: T2N0M0                               |
| Stage III: T3N0M0                              |
| Stage IVa: T4N0M0 or any TN1M0                 |
| Stage IVb: Any TN0-N1M1                        |

LCSGJ: Liver Cancer Study Group of Japan, TNM stage: tumor node metastasis stage, \* The three factors are single lesion, lesion measuring <2 cm, and no vascular involvement.

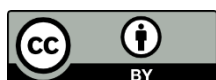

© 2022 by the authors. Licensee MDPI, Basel, Switzerland. This article is an open access article distributed under the terms and conditions of the Creative Commons Attribution (CC BY) license (<http://creativecommons.org/licenses/by/4.0/>).
